# Supplementary material for: Learning curve for the perinatal outcomes of radiofrequency ablation for selective fetal reduction: a single-center, 10-year experience from 2013 to 2023
Source: publisher site journal article supplement (doi:10.1515/jpm-2024-0201), 2024-12-20
Supplement: Supplementary file 1 [file j_jpm-2024-0201_suppl_001.docx]

Supplemental Table1: Factors influencing the choices for RFA in TTTS cases

| TTTS stage | Case | Age | Gravidity (time) | Parity (time) | Severe fetal conditions | | | | History of CS | Advanced age (≥40 years) | Maternal complication | Difficulties of fetoscopic |
| --- | --- | --- | --- | --- | --- | --- | --- | --- | --- | --- | --- | --- |
| Heart failure | Severe hydrops | Fetal anomaly | Growth restriction |
| TTTS Ⅱ (n=10) | case 1 | 37 | 2 | 1 |  |  |  | √ | √ |  |  | √ |
| case 2 | 27 | 0 | 0 |  |  | √(ventricular septal defect） |  |  |  |  |  |
| case 3 | 29 | 2 | 1 |  |  |  |  | √ |  |  |  |
| case 4 | 32 | 2 | 1 |  |  |  |  | √ |  |  |  |
| *case 5 | 28 | 2 | 0 |  |  |  |  |  |  |  |  |
| case 6 | 40 | 1 | 0 |  |  |  |  |  | √ |  |  |
| case 7 | 28 | 0 | 0 | √ |  |  |  |  |  |  |  |
| case 8 | 27 | 0 | 0 |  |  |  | √ |  |  |  |  |
| *case 9 | 32 | 1 | 1 |  |  |  |  |  |  |  |  |
| *case 10 | 32 | 0 | 0 |  |  |  |  |  |  |  |  |
| TTTS Ⅲ (n=19) | case 1 | 19 | 1 | 0 | √ |  | √ (aortic arch stenosis) |  |  |  |  |  |
| case 2 | 31 | 0 | 0 | √ |  |  |  |  |  | √ (chronic hypertension) |  |
| case 3 | 29 | 0 | 0 |  |  | √ (acromphalus) |  |  |  |  |  |
| *case 4 | 32 | 0 | 0 |  |  |  |  |  |  |  |  |
| case 5 | 43 | 2 | 1 |  |  |  |  | √ |  | √ (anemia) |  |
| case 6 | 32 | 2 | 0 | √ |  |  |  |  |  |  |  |
| case 7 | 38 | 1 | 1 | √ |  |  | √ | √ |  |  |  |
| case 8 | 23 | 1 | 0 | √ |  |  | √ | √ |  |  |  |
| *case 9 | 33 | 1 | 1 |  |  |  |  |  |  |  |  |
| *case 10 | 30 | 2 | 1 |  |  |  |  |  |  |  |  |
| *case 11 | 33 | 1 | 1 |  |  |  |  |  |  |  |  |
| case 12 | 40 | 1 | 1 |  |  | √ (mass in the liver) |  |  |  |  |  |
| case 13 | 32 | 0 | 0 |  |  |  |  |  |  | √ (history of myomectomy) |  |
| case 14 | 37 | 1 | 1 |  |  |  |  | √ |  |  | √ |
| case 15 | 27 | 1 | 0 |  |  |  |  |  |  | √ (hyperthyroidism) |  |
| *case 16 | 34 | 2 | 0 |  |  |  |  |  |  |  |  |
| *case 17 | 31 | 3 | 1 |  |  |  |  |  |  |  |  |
| case 18 | 26 | 0 | 0 | √ |  |  |  |  |  | √ (chronic hypertension) |  |
| case 19 | 29 | 0 | 0 | √ |  |  |  |  |  |  |  |
| TTTS Ⅳ (n=11) | *case 1 | 28 | 1 | 0 |  |  |  |  |  |  |  |  |
| case 2 | 26 | 0 | 0 | √ |  |  |  |  |  |  |  |
| case 3 | 27 | 1 | 0 | √ |  | √ (aortic arch stenosis) |  |  |  |  |  |
| case 4 | 34 | 1 | 0 | √ |  | √ (pulmonary stenosis) |  |  |  |  |  |
| case 5 | 28 | 1 | 0 |  |  |  |  |  |  | √ (hyperthyroidism) |  |
| case 6 | 31 | 2 | 1 | √ |  |  |  |  |  |  |  |
| case 7 | 31 | 2 | 2 | √ |  |  |  |  |  |  |  |
| case 8 | 25 | 1 | 0 | √ |  |  |  |  |  |  |  |
| case 9 | 29 | 0 | 0 | √ |  |  | √ |  |  |  |  |
| case 10 | 28 | 0 | 0 | √ |  | √ (ventricular septal defect) |  |  |  |  |  |
| case 11 | 39 | 1 | 0 | √ |  |  |  |  |  |  |  |

* Those who did not have these factors only because of parental preference.
